# Supplementary material for: Phytomanagement of a Trace Element-Contaminated Site to Produce a Natural Dye: First Screening of an Emerging Biomass Valorization Chain
Source: MDPI journal article supplement (doi:10.3390/app112210613), 2021-11-11
Supplement: s1 [file s1]

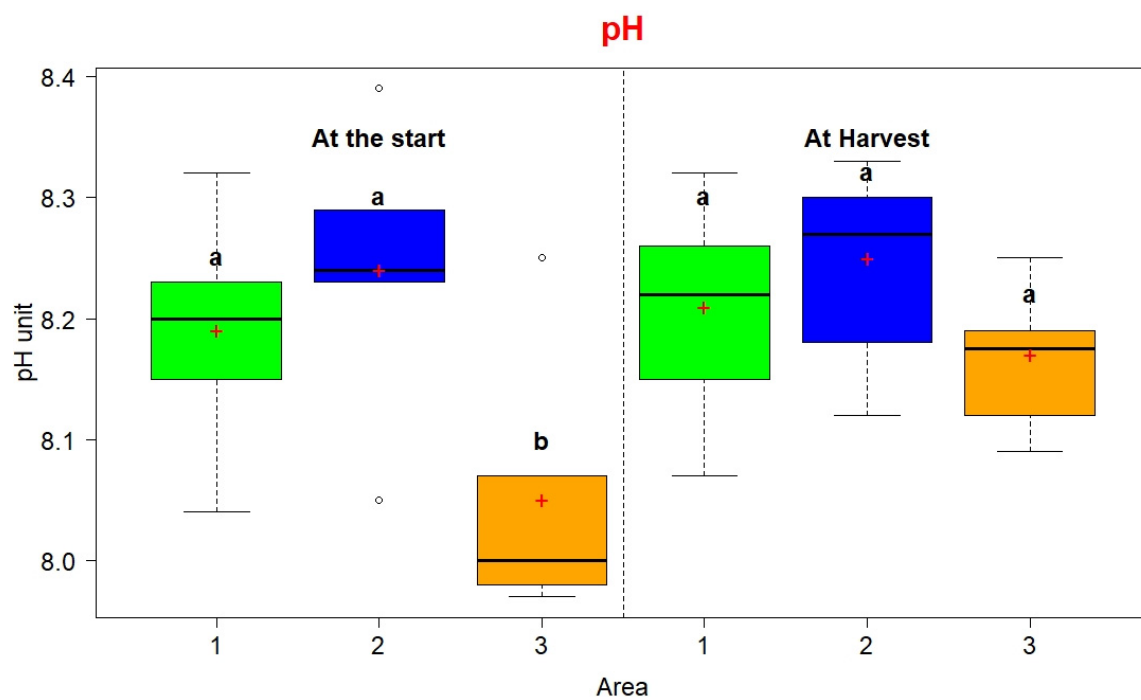

**Supplemental Figure S1.** Water pH in sediment on Area 1 (green), Area 2 (blue), and Area 3 (orange) at the start (n = 5) and at harvest (n = 10) (the box plots indicate the median (black line) and the 25 (lower bar) and 75 (upper bar) percentiles; red cross = mean). Significant differences between conditions are indicated by different letters at the level of  $\alpha = 0.05$ .

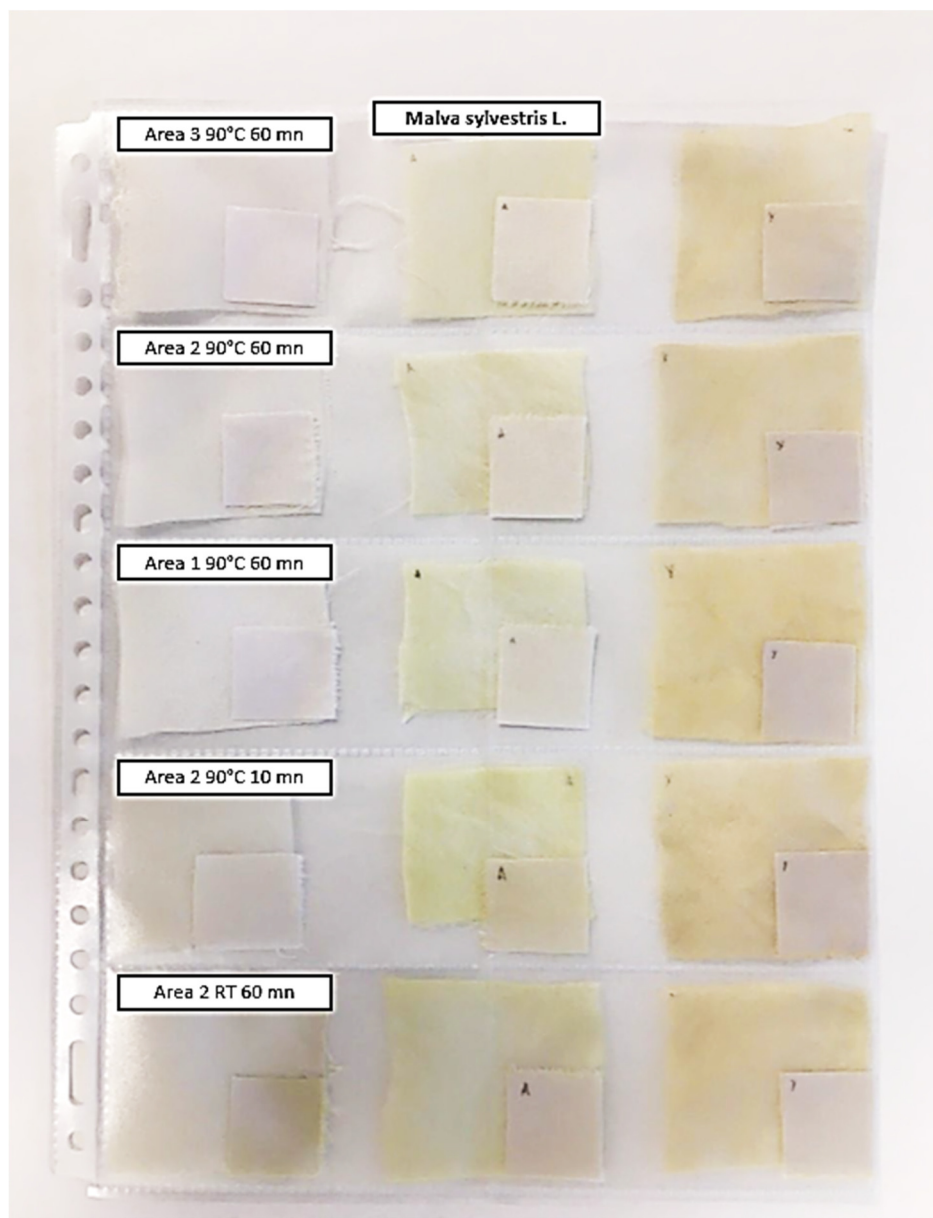

**Supplemental Figure 2.** Picture of fabric dyed with *Malva sylvestris* L. extract depending on the area of cultivation, the temperature of extraction, the fabric origins, and the pretreatment. The small fabric squares are cotton, and the large fabric squares are silk. From left to right, the fabric was either not pretreated, pretreated with alum, and pretreated with iron.

**Supplemental Table 1.** List of the agronomic analyses and methods performed by the subcontracted laboratory.

| Parameter                                                               | Method               |
|-------------------------------------------------------------------------|----------------------|
| Carbon (g kg <sup>-1</sup> )                                            | NF ISO 14235         |
| Organic matter (g kg <sup>-1</sup> )                                    | calculated           |
| C/N *                                                                   | calculated           |
| CEC (meq 100 g <sup>-1</sup> )                                          | NF X 31-130          |
| CaO g kg <sup>-1</sup>                                                  | NF X 31-108          |
| N kjeldahl TNK +++ (g kg <sup>-1</sup> )                                | NF ISO 11 261        |
| Phosphorus Olsen<br>(g kg <sup>-1</sup> ) P <sub>2</sub> O <sub>5</sub> | NF ISO 11 263        |
| pH-H <sub>2</sub> O                                                     | NF ISO 10390         |
| Clay                                                                    | NF X 31-107 modified |
| Silt                                                                    | NF X 31-107 modified |
| Sand                                                                    | NF X 31-107 modified |

**Supplemental Table 2.** Percentage of mobile trace elements (Cd, Cu, Pb, Zn) calculated as extractable concentrations over total concentrations in sediment at the three areas, at the start (n = 5), and at the harvest (n = 10) (mean ± SD). Significant differences between conditions are indicated by different letters (normal or italic) or numbers (normal or italic) at the level of  $\alpha = 0.05$  (Tukey HSD test).

|               |                     | Cd                         | Cu                           | Pb                         | Zn                          |
|---------------|---------------------|----------------------------|------------------------------|----------------------------|-----------------------------|
| <b>Area 1</b> | <b>At the start</b> | 0.51 (0.09) <sup>a,b</sup> | 0.47 (0.07) <sup>a</sup>     | 0.007 (0.003) <sup>1</sup> | 0.06 (0.006) <sup>1</sup>   |
|               | <b>At harvest</b>   | 0.5 (0.06) <sup>b</sup>    | 0.6 (0.07) <sup>a,b</sup>    | 0.009 (0.003) <sup>1</sup> | 0.07 (0.005) <sup>1,3</sup> |
| <b>Area 2</b> | <b>At the start</b> | 0.69 (0.06) <sup>a</sup>   | 0.68 (0.1) <sup>b,c</sup>    | 0.006 (0.001) <sup>1</sup> | 0.09 (0.01) <sup>2,3</sup>  |
|               | <b>At harvest</b>   | 0.68 (0.13) <sup>a</sup>   | 0.74 (0.14) <sup>c</sup>     | 0.012 (0.005) <sup>1</sup> | 0.1 (0.02) <sup>2</sup>     |
| <b>Area 3</b> | <b>At the start</b> | 0.57 (0.06) <sup>a,b</sup> | 0.47 (0.07) <sup>a</sup>     | 0.005 (0.003) <sup>1</sup> | 0.08 (0.02) <sup>1,2</sup>  |
|               | <b>At harvest</b>   | 0.56 (0.13) <sup>a,b</sup> | 0.62 (0.08) <sup>a,b,c</sup> | 0.007 (0.004) <sup>1</sup> | 0.08 (0.03) <sup>1,2</sup>  |

**Supplemental Table 3.** OEKO-Tex TE concentration threshold limit value (extractable and total in µg g<sup>-1</sup>) in textile directly in contact with skin.

|                    | Cd  | Cu | Pb | Zn  |
|--------------------|-----|----|----|-----|
| <b>Extractable</b> | 0.1 | 50 | 1  | 750 |
| <b>Total</b>       | 40  | -  | 90 | -   |
